# Supplementary material
Source: publisher figshare collection journal article supplement (https://acs.figshare.com/ndownloader/files/8676238)
Supplement: Supplementary file 1 [file 8676238]

**Supporting Information For:**  
**Cp\*Ir-catalyzed Acceptorless Dehydrogenation of Carbon–Carbon  
Single Bonds**

Hideaki Ando,<sup>†</sup> Shuhei Kusumoto,<sup>†</sup> Weiwei Wu,<sup>‡</sup> Kyoko Nozaki<sup>\*,†</sup>

<sup>†</sup>Department of Chemistry and Biotechnology, Graduate School of Engineering, The University of Tokyo, 7-3-1 Hongo, Bunkyo-Ku, Tokyo 113-8656, Japan.

<sup>‡</sup>Department of Chemistry, Stanford University, Stanford, CA 94305, USA

|                                                                                                                                     |    |
|-------------------------------------------------------------------------------------------------------------------------------------|----|
| Contents                                                                                                                            | S1 |
| <b>Figure S1</b> Experimental equipment for dehydrogenation reaction.                                                               | S2 |
| <b>Additional experimental results</b>                                                                                              |    |
| <b>Table S1</b> Dehydrogenation of $\alpha$ -tetralone to naphthol under varied reaction temperature                                | S3 |
| <b>Table S2</b> Dehydrogenation of $\alpha$ -tetralone to naphthol in various solvents                                              | S3 |
| <b>Table S3</b> Dehydrogenation of $\alpha$ -tetralone to naphthol with other catalysts                                             | S4 |
| <b>Table S4</b> Time course dependency in dehydrogenation of $\alpha$ -tetralone by complex <b>B</b> :<br>Detected induction period | S4 |
| <b>Table S5</b> Hydrogenation of 1-Naphthol by <b>C1</b>                                                                            | S5 |
| Analysis of the evolved dihydrogen in dehydrogenation of $\alpha$ -tetralone                                                        | S5 |
| <b>References</b>                                                                                                                   | S5 |

## Experimental equipment

(a) entry 18 Table 1 (b) entry 19 Table 1 (c) other entries

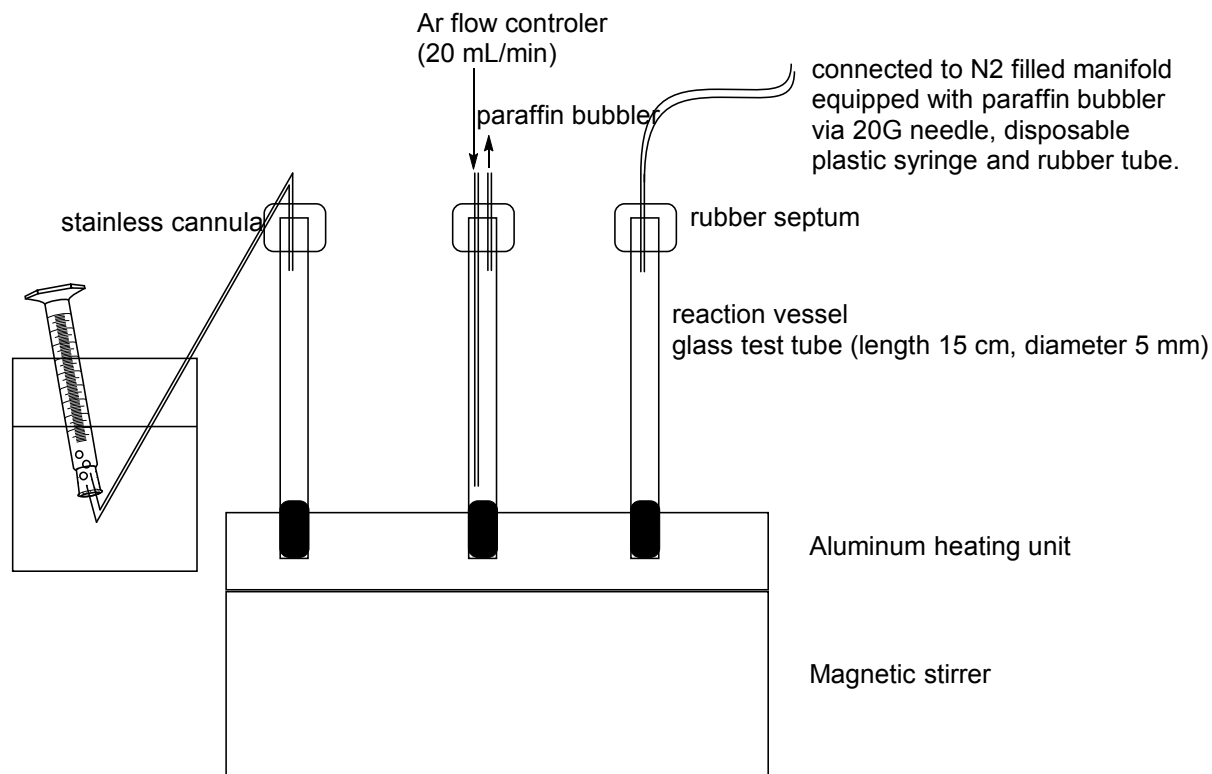

**Figure S1 Experimental equipment for dehydrogenation reaction**

## ADDITIONAL EXPERIMENTAL RESULTS

**Table S1** Dehydrogenation of  $\alpha$ -tetralone to naphthol under varied reaction temperature<sup>a</sup>

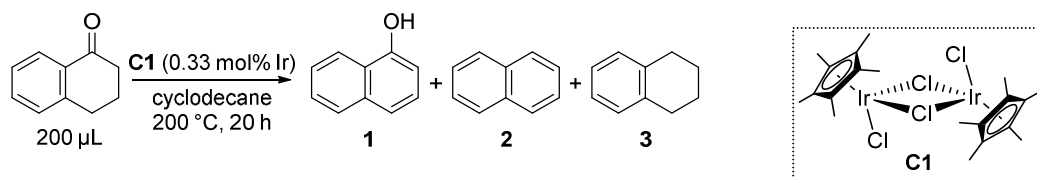

| Entry | Temperature | Conv.<br>(%) <sup>b</sup> | Yield (%) <sup>b</sup> |     |     |
|-------|-------------|---------------------------|------------------------|-----|-----|
|       |             |                           | 1                      | 2   | 3   |
| 1     | 200         | 59                        | 47                     | 1.2 | 0.0 |
| 2     | 180         | 44                        | 30                     | 6.6 | 3.4 |
| 3     | 160         | 15                        | 14                     | 0.1 | 1.5 |

<sup>a</sup>Reaction condition: Complex **C1** (0.33 mol% as Ir metal),  $\alpha$ -tetralone 200  $\mu$ L (1.5 mmol), cyclodecane 200  $\mu$ L, 20 hours.  
<sup>b</sup>Yields are determined by GC analysis of the reaction mixture with dodecane as an internal standard.

**Table S2** Dehydrogenation of  $\alpha$ -tetralone to naphthol in various solvents<sup>a</sup>

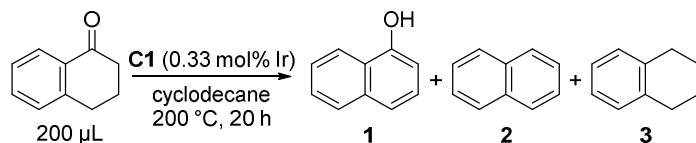

| Entry | Solvent                            | Conv.<br>(%) <sup>b</sup> | Yield (%) <sup>b</sup> |     |     |
|-------|------------------------------------|---------------------------|------------------------|-----|-----|
|       |                                    |                           | 1                      | 2   | 3   |
| 1     | Cyclodecane                        | 59                        | 47                     | 1.2 | 0.0 |
| 2     | hexylcyclohexane                   | 85                        | 58                     | 12  | 2.8 |
| 3     | hexylbenzene                       | 35                        | 29                     | 1.7 | 1.4 |
| 4     | 2-methylbiphenyl                   | 39                        | 29                     | 2.6 | 0.6 |
| 5     | Tetraethyleneglycol dimethyl ether | 64                        | 41                     | 7.1 | 8.1 |

<sup>a</sup>Reaction condition: Complex **C1** (0.33 mol% as Ir metal),  $\alpha$ -tetralone 200  $\mu$ L (1.5 mmol), solvent 200  $\mu$ L, 200 °C, 20 hours. All solvents were purchased from Tokyo Chemical Industry, Co. Ltd. (TCI) and degassed by freeze-pump-thaw before use. <sup>b</sup>Yields are determined by GC analysis of the reaction mixture with dodecane as an internal standard.

When hexylcyclohexane was employed as solvent (entry 2), the conversion and yield of naphthol increased compared to entry 1, but at the same time hydrogenation of aromatic ring was also accelerated to produce **2** and **3**. Aromatic solvent (hexylbenzene and

2-methylbiphenyl) decreased the conversion and yield of 1-naphthol (entries 3 and 4). In ether solvent (entry 5), the conversion and yield of 1-naphthol was comparable to entry 1 albeit with lower selectivity for the production of 1-naphthol.

**Table S3** Dehydrogenation of  $\alpha$ -tetralone to naphthol with other catalysts<sup>a</sup>

| Entry | Catalyst  | Conv. (%) <sup>b</sup> | Yield (%) <sup>b</sup> |      |     |
|-------|-----------|------------------------|------------------------|------|-----|
|       |           |                        | 1                      | 2    | 3   |
| 1     | <b>C1</b> | 59                     | 47                     | 1.2  | 0.0 |
| 2     | <b>J</b>  | 90                     | 3.5                    | 22   | 0.5 |
| 3     | <b>K</b>  | 47                     | 23                     | 0.0  | 0.0 |
| 4     | <b>L</b>  | 10                     | 3.2                    | 0.11 | 0.0 |
| 5     | <b>M</b>  | 12                     | 0.2                    | 0.0  | 0.0 |

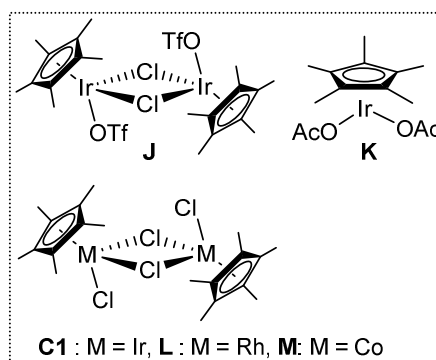

<sup>a</sup>Reaction condition: iridium complex (0.33 mol% as Ir metal),  $\alpha$ -tetralone 200  $\mu$ L (1.5 mmol), cyclodecane 200  $\mu$ L, 200 °C, 20 hours. <sup>b</sup>Yields are determined by GC analysis of the reaction mixture with dodecane as an internal standard.

Replacement of two chloride in complex **C** to triflate (Complex **J**) showed high conversion to give naphthalene instead of naphthol as the major product along with many kinds of products, presumably dimerized compounds after aldol condensation or oxidative coupling of aromatic rings (Entry 2 Table S3). Acetate complex **K** afforded moderate yield of 1-naphthol with formation of unidentified products in ca. 20% yield. Analogous rhodium and cobalt complexes **L** and **M** resulted in formation of only small amount of 1-naphthol formation.

**Table S4** Time course dependency in dehydrogenation of  $\alpha$ -tetralone by complex **B**: Detected induction period<sup>a</sup>

| Entry | Time (h) | Conv. (%) <sup>b</sup> | Yield (%) <sup>b</sup> |     |     |
|-------|----------|------------------------|------------------------|-----|-----|
|       |          |                        | 1                      | 2   | 3   |
| 1     | 1        | 3.5                    | 0.0                    | 0.0 | 0.0 |
| 2     | 2        | 1.1                    | 0.0                    | 0.0 | 0.0 |
| 3     | 20       | 11                     | 6.8                    | 0.0 | 0.0 |

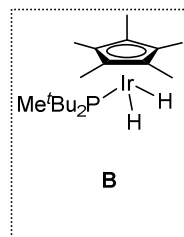

<sup>a</sup>Reaction condition: complex **B** (0.33 mol%),  $\alpha$ -tetralone 200  $\mu$ L (1.5 mmol), cyclodecane 200  $\mu$ L, 200 °C, 20 hours. <sup>b</sup>Yields are determined by GC analysis of the reaction mixture with dodecane as an internal standard.

Induction period longer than 1 hour was observed in dehydrogenation of  $\alpha$ -tetralone by Cp\*iridium dihydride complex **B**. In 1–2 hours, no 1-naphthol, naphthalene or tetralin formation was observed, while in 20 hours of the reaction, a small amount of

dehydrogenated product (1-naphthol) was observed, which implies there is a long induction period to generate catalytic active species from **B**.

**Table S5** Hydrogenation of 1-Naphthol by **C1**<sup>a</sup>

|             |         |                        |     |     |
|-------------|---------|------------------------|-----|-----|
|             |         |                        |     |     |
| 1<br>220 mg |         | $\alpha$ -tetralone    | 2   | 3   |
| Time (h)    | Conv(%) | Yield (%) <sup>b</sup> |     |     |
|             |         | $\alpha$ -tetralone    | 2   | 3   |
| 1           | 0       | 0.1                    | 0   | 0   |
| 20          | 56      | 50                     | 1.4 | 1.5 |

<sup>a</sup>Reaction condition: complex **C1** (0.33 mol%), 1-naphthol 220 mg (1.5 mmol), cyclodecane 200  $\mu$ L, 200  $^{\circ}$ C, under H<sub>2</sub> (1 atm). <sup>b</sup>Yields are determined by GC analysis of the reaction mixture with dodecane as an internal standard.

We conducted the hydrogenation of 1-naphthol by **C1** under 1 atm of H<sub>2</sub>. Hydrogenated product,  $\alpha$ -tetralone was given as the major product in 20 hours, accompanied by the production of naphthalene and tetralin in trace amounts. Thus, the reversibility of dehydrogenation of  $\alpha$ -tetralone was confirmed.

#### Analysis of the evolved gas in dehydrogenation of $\alpha$ -tetralone (entry 19, Table 1)

During the reaction, the evolved gas (6.4 mL) was collected by water displacement method and subjected to GC analysis. The ratio of dihydrogen and argon in the gas phase was determined to be 43:57. As the initially filled argon gas was 4.1 mL, the amount of evolved dihydrogen was calculated to be ca. 3.1 mL, 138  $\mu$ mol.

#### Reference

- (1) Kusumoto, S.; Akiyama, M.; Nozaki, K. *J. Am. Chem. Soc.* **2013**, *135* (50), 18726–18729.
